# Supplementary material for: Galectin-3 and Blood Group: Binding Properties, Effects on Plasma Levels, and Consequences for Prognostic Performance
Source: MDPI journal article supplement (doi:10.3390/ijms24054415), 2023-02-23

**Supplemental Table S1.** Baseline characteristics of the PREVEND study participants, stratified by ABO blood group.

| Clinical characteristics                | Total<br>(n=3552) | Blood group O<br>(n=1557) | Blood group A<br>(n=1,606) | Blood group B<br>(n=271) | Blood group AB<br>(n=118) | <i>p</i> -value |
|-----------------------------------------|-------------------|---------------------------|----------------------------|--------------------------|---------------------------|-----------------|
| Age (y), mean (SD)                      | 50 (12)           | 49 (12)                   | 50 (13)                    | 51 (12)                  | 49 (12)                   | 0.28            |
| Male sex, <i>n</i> (%)                  | 1,812 (51)        | 794 (51)                  | 830 (52)                   | 125 (46)                 | 63 (53)                   | 0.35            |
| Smoked last 5 years, <i>n</i> (%)       | 1,610 (45)        | 720 (46)                  | 730 (45)                   | 115 (42)                 | 45 (38)                   | 0.33            |
| BMI (kg/m <sup>2</sup> ), mean (SD)     | 26 (4)            | 26 (4)                    | 26 (4)                     | 26 (4)                   | 26 (4)                    | 0.28            |
| Heart rate (bpm), median [IQR]          | 68 [62-75]        | 68 [62-75]                | 68 [62-75]                 | 70 [64-77]               | 70 [62-78]                | 0.051           |
| Systolic blood pressure, median [IQR]   | 126 [114-141]     | 125 [113-141]             | 126 [114-141]              | 126 [113-145]            | 124 [116-140]             | 0.85            |
| Diastolic blood pressure, median [IQR]  | 73 [67-80]        | 73 [67-81]                | 73 [67-80]                 | 75 [67-81]               | 75 [69-80]                | 0.53            |
| <b>Medical history, <i>n</i> (%)</b>    |                   |                           |                            |                          |                           |                 |
| Type 2 diabetes mellitus, <i>n</i> (%)  | 53 (1)            | 25 (2)                    | 21 (2)                     | 4 (1)                    | 3 (3)                     | 0.71            |
| (History of) hypertension, <i>n</i> (%) | 1,057 (30)        | 460 (30)                  | 488 (30)                   | 72 (27)                  | 37 (31)                   | 0.28            |
| <b>Laboratory measurements</b>          |                   |                           |                            |                          |                           |                 |
| eGFR, median [IQR]                      | 97 [85-107]       | 96 [84-107]               | 97 [85-107]                | 97 [81-107]              | 95 [88-109]               | 0.86            |
| Glucose (mmol/L), median [IQR]          | 4.7 [4.3-5.1]     | 4.7 [4.3-5.1]             | 4.7 [4.4-5.2]              | 4.7 [4.4-5.0]            | 4.7 [4.3-5.1]             | 0.52            |
| Cholesterol (mmol/L), median [IQR]      | 5.6 [4.9-6.4]     | 5.5 [4.9-6.3]             | 5.6 [4.9-6.4]              | 5.6 [4.9-6.3]            | 5.6 [4.9-6.5]             | 0.29            |
| LDL (mmol/L), median [IQR]              | 3.6 [3.0-4.3]     | 3.3 [2.7-4.2]             | 3.5 [2.8-4.2]              | 3.4 [2.6-4.0]            | 3.8 [2.8-4.1]             | 0.52            |
| HDL (mmol/L), median [IQR]              | 1.3 [1.0-1.5]     | 1.3 [1.0-1.5]             | 1.3 [1.0-1.5]              | 1.3 [1.1-1.6]            | 1.3 [1.0-1.5]             | 0.58            |
| Triglycerides (mmol/L), median [IQR]    | 1.2 [0.8-1.7]     | 1.2 [0.8-1.7]             | 1.2 [0.9-1.7]              | 1.1 [0.8-1.7]            | 1.4 [0.9-1.9]             | 0.14            |
| NT-proBNP (ng/L), median [IQR]          | 37.2 [16.5-73.7]  | 36.5 [16.2-74.8]          | 36.9 [16.1-72.4]           | 41.8 [20.0-78.7]         | 33.8 [15.0-62.4]          | 0.27            |
| Galectin-3 (µg/L), mean (SD)            | 11.5 (4.0)        | 12.0 (3.9)                | 11.1 (3.7)                 | 10.8 (4.4)               | 10.9 (4.4)                | <0.001          |

Abbreviations: BMI, body mass index; bpm, beats per minute; eGFR, estimated glomerular filtration rate; HDL, high-density lipoprotein; LDL, low-density lipoprotein; NT-proBNP, N-terminal pro-B-type natriuretic peptide.

**Supplemental Table S2:** Hazard ratio [95% CI] for all-cause mortality, divided by blood group, using blood group O as the reference group, in the LURIC and PREVEND cohort.

|                         | <u>LURIC study</u> |                 | <u>PREVEND study</u> |                 |
|-------------------------|--------------------|-----------------|----------------------|-----------------|
|                         | HR [95% CI]        | <i>p</i> -value | HR [95% CI]          | <i>p</i> -value |
| <b>Blood group:</b>     |                    |                 |                      |                 |
| O                       | 1.00               |                 | 1.00                 |                 |
| non-O                   | 1.08 [0.93-1.26]   | 0.296           | 1.13 [0.92-1.40]     | 0.250           |
| + Adjusted for age, sex |                    |                 |                      |                 |
| O                       | 1.00               |                 | 1.00                 |                 |
| non-O                   | 1.06 [0.92-1.24]   | 0.386           | 1.07 [0.87-1.33]     | 0.510           |
| + Fully adjusted*       |                    |                 |                      |                 |
| O                       | 1.00               |                 | 1.00                 |                 |
| non-O                   | 1.06 [0.91-1.23]   | 0.461           | 1.02 [0.81-1.29]     | 0.857           |

\* Adjusted for age, sex, eGFR, smoking, systolic blood pressure, BMI, LDL-cholesterol, diabetes mellitus, lipid lowering therapy, triglycerides, CRP.

**Supplemental Figure S1.** Plasma galectin-3 levels in PREVEND participants, stratified by ABO blood group.

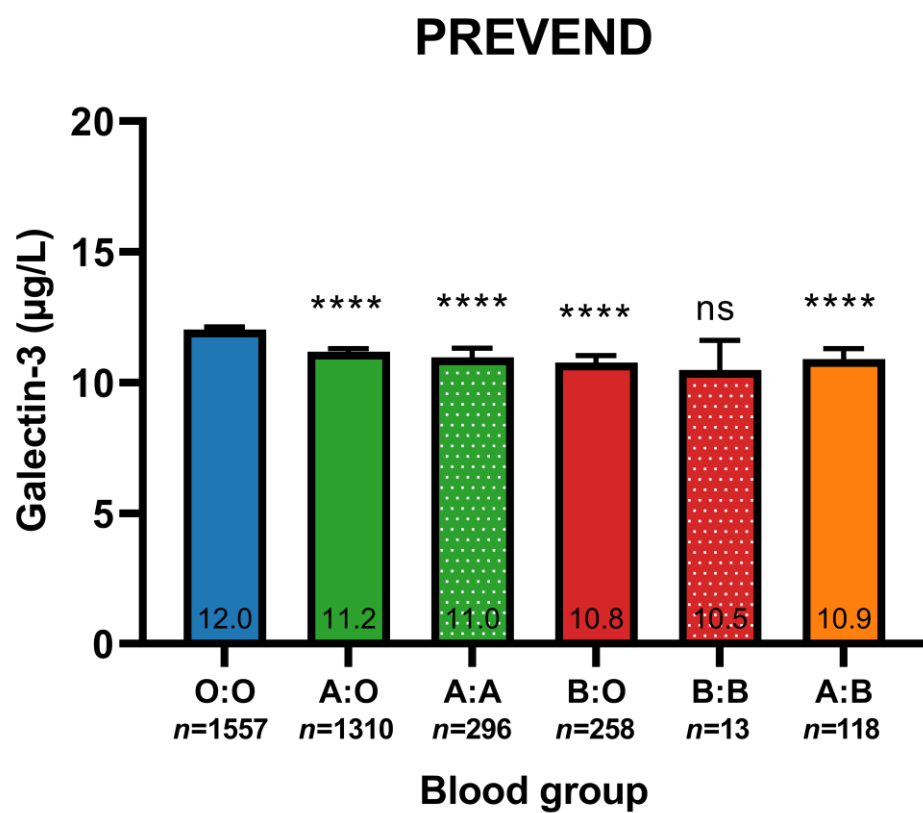

**Supplemental Figure S2.** Example of a hemagglutination assay.

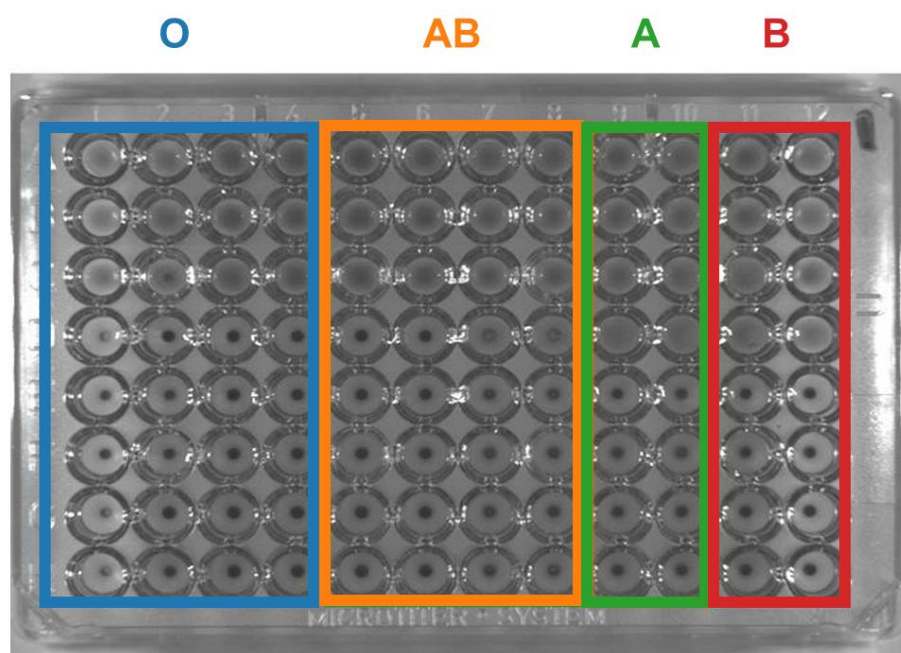

Supplement: s1 [file s1]
